# Supplementary material for: PRH1 mediates ARF7-LBD dependent auxin signaling to regulate lateral root development in Arabidopsis thaliana
Source: PLoS Genet. 2020 Feb 7;16(2):e1008044. doi: 10.1371/journal.pgen.1008044 (PMC7006904; doi:10.1371/journal.pgen.1008044)
Supplement: S2 Table — (XLSX) [file pgen.1008044.s010.xlsx]

## Sheet: Title GeneDiffExpFilter
Title	Transcriptomic analysis of Col and arf7 responding to auxin.
Summary	The goal of this study is to clarify the function of ARF7 in the pathway of auxin inducing lateral root development. We isolated total RNA from the roots of 8-day-old Col-0 and arf7 seedlings. New genes act downstream of ARF7 after responding to auxin treatment, during the lateral root formation, are discovered.
Overall design	We isolated total RNA from the roots of 8-day-old Col-0 and arf7 seedlings with or without auxin treatment.
Sample name	Title	Source name	Organism	Characteristics: seedling age	characteristics: tissue	characteristics: genotype	molecule
Sample 1	Col-MOCK	Arabidopsis	seedlings	8-day-old	Roots	wild type	total RNA
Sample 2	Col-NAA	Arabidopsis	seedlings	8-day-old	Roots	wild type	total RNA
Sample 3	arf7-MOCK	Arabidopsis	seedlings	8-day-old	Roots	arf7 T-DNA mutant	total RNA
Sample 4	arf7-NAA	Arabidopsis	seedlings	8-day-old	Roots	arf7 T-DNA mutant	total RNA

## Sheet: arf7-NAA VS arf7-MOCK
	arf7-NAA VS arf7-MOCK
GeneID	log2 Ratio	P-value
AT1G01110.2	1.22057	2.02e-05
AT1G01580.1	-1.75121	2.11e-47
AT1G03106.1	3.21117	3.23e-06
AT1G04560.1	9.67176	8.65e-16
AT1G07400.1	-1.35074	2.08e-33
AT1G07550.1	-1.20111	3.34e-06
AT1G09310.1	2.32665	7.17e-27
AT1G09950.1	-2.34342	2.66e-07
AT1G13500.1	-3.01765	2.12e-05
AT1G17420.1	-2.68122	3.68e-06
AT1G17840.1	1.37382	1.15e-05
AT1G18300.1	-1.16131	7.87e-31
AT1G18650.1	1.14487	3.4e-06
AT1G19020.1	-1.02914	1.24e-30
AT1G19250.1	-1.90217	3.25e-06
AT1G19380.1	-1.27134	1.52e-05
AT1G20340.1	1.76614	3.9e-23
AT1G21140.1	-1.21971	1.69e-08
AT1G28480.1	-1.32886	2.15e-09
AT1G29910.1	3.11164	7.88e-09
AT1G29930.1	2.75125	7.51e-85
AT1G31330.1	1.57018	4.92e-17
AT1G32060.1	2.29998	5.17e-10
AT1G32560.1	3.54375	4.2e-08
AT1G42970.1	2.28225	1.1e-14
AT1G43800.1	1.07099	1.06e-07
AT1G50750.1	-1.46655	7.37e-20
AT1G52230.1	3.21117	3.23e-06
AT1G54050.1	-1.26618	3.92e-12
AT1G54870.1	4.17053	3.3e-09
AT1G55670.1	1.81262	8.73e-11
AT1G56600.1	-1.44908	2.97e-05
AT1G59860.1	-1.56608	6.16e-16
AT1G61800.1	7.35112	2.9e-06
AT1G66400.1	-1.52991	6.96e-09
AT1G66500.1	-1.27523	7.45e-16
AT1G67090.1	2.30428	1.1e-10
AT1G67740.1	2.16463	5.28e-16
AT1G68250.1	8.43576	7.05e-07
AT1G72100.1	7.50265	3.47e-07
AT1G73120.1	-2.90217	1.67e-17
AT1G73540.1	-1.14965	1.15e-28
AT1G74310.1	-1.56037	2.32e-281
AT1G74930.1	-1.76611	6.41e-07
AT1G75260.1	-1.49932	4.24e-08
AT1G78820.1	2.45628	9.63e-06
AT1G80840.1	-1.6504	1.23e-40
AT2G06520.1	1.07808	1.54e-06
AT2G18150.1	-1.29633	3.3e-09
AT2G18540.1	4.28917	1.59e-05
AT2G19800.1	-1.12903	1.16e-47
AT2G19900.1	1.17483	1.02e-08
AT2G20560.1	-1.09043	1.06e-55
AT2G21490.1	8.5489	1.71e-07
AT2G22880.1	-2.00505	2.41e-11
AT2G23170.1	1.25979	2.53e-90
AT2G24980.1	1.22404	1.53e-60
AT2G25460.1	-1.09273	2.03e-15
AT2G26530.1	-1.56881	1.14e-05
AT2G26560.1	1.86437	7.35e-06
AT2G28210.1	-1.16277	4.98e-10
AT2G28490.1	4.21117	3.09e-05
AT2G29450.1	-1.21193	1.16e-49
AT2G30570.1	1.8486	4.16e-06
AT2G34420.1	1.0543	5.19e-06
AT2G35300.1	1.62621	1.74e-05
AT2G36640.1	2.62621	1.81e-09
AT2G36800.1	2.36317	2.86e-05
AT2G38530.1	2.31313	2.56e-56
AT2G38540.1	2.08855	1.86e-08
AT2G39650.1	-1.01905	6.07e-08
AT2G42220.1	3.04125	1.99e-05
AT2G42560.1	5.2507	1.39e-20
AT2G43120.1	-1.2347	2.88e-14
AT2G46240.1	-1.43395	1.09e-50
AT2G46400.1	-1.30668	3.89e-06
AT2G47780.1	8.88194	5.96e-10
AT3G01570.1	2.07687	5.66e-06
AT3G02480.1	4.19099	5.87e-34
AT3G02840.1	-1.69572	2.35e-06
AT3G04290.1	7.83683	4.16e-08
AT3G07090.1	-1.01039	4.18e-66
AT3G14200.1	-1.2908	8.99e-57
AT3G15670.1	3.68066	4.13e-35
AT3G17520.1	5.56481	2.41e-38
AT3G19710.1	-1.43169	6.35e-12
AT3G20760.1	-3.76611	1.34e-15
AT3G21055.1	2.47009	3.38e-11
AT3G21720.1	2.77441	0
AT3G22120.1	1.43148	1.07e-24
AT3G22640.1	9.14599	5.17e-21
AT3G22900.1	2.79613	1.36e-05
AT3G24500.1	-1.38452	9.5e-35
AT3G26650.1	1.65478	3.52e-14
AT3G28580.1	-1.08734	7.18e-07
AT3G29000.1	-1.43268	1.76e-14
AT3G44870.1	-4.41818	4.08e-06
AT3G50930.1	-1.25849	8.81e-36
AT3G51810.1	9.15458	8.54e-12
AT3G51910.1	-1.29999	4.76e-56
AT3G54940.2	9.20972	6.11e-18
AT3G55800.1	1.90374	2.3e-05
AT3G56400.1	-1.04672	1.36e-15
AT3G61390.2	-1.3487	6.89e-06
AT3G61470.1	2.08227	1.36e-13
AT4G01250.1	-1.07011	1.17e-08
AT4G02770.1	2.22345	5.28e-16
AT4G04890.1	2.38702	1.38e-09
AT4G10340.1	1.94171	4.7e-13
AT4G11280.1	-1.04021	6.83e-38
AT4G12800.1	3.04125	3.7e-11
AT4G13395.1	-1.74425	8.8e-13
AT4G13770.1	-1.42824	4.02e-13
AT4G15150.1	-1.01765	4.07e-07
AT4G17600.1	2.36317	2.86e-05
AT4G19690.2	-1.95638	1.47e-62
AT4G21020.1	5.32665	2.18e-11
AT4G27280.1	-1.24184	5.97e-52
AT4G28110.1	-1.09184	1.38e-12
AT4G28750.1	2.6966	4.09e-11
AT4G29780.1	-1.02068	1.19e-37
AT4G31940.1	-2.51334	2.31e-14
AT4G34410.1	-1.79525	3.25e-17
AT4G36600.1	8.93279	2.48e-13
AT4G37800.1	2.5773	1.55e-05
AT4G39670.1	-1.06479	1.33e-06
AT5G04530.1	7.32264	3.47e-07
AT5G06630.1	1.01692	9.21e-27
AT5G06640.1	1.11492	2.14e-116
AT5G12020.1	-1.61083	1.78e-06
AT5G15780.1	4.04125	5.36e-12
AT5G20250.4	-1.03054	2.28e-05
AT5G20630.1	3.96725	4.26e-18
AT5G23010.1	-1.64681	1.17e-17
AT5G23020.1	-1.3002	2.14e-53
AT5G28630.1	-1.16311	2.15e-06
AT5G38420.1	3.12871	1.62e-10
AT5G38430.1	4.28917	4.59e-10
AT5G38700.1	-1.48232	4.27e-06
AT5G40000.1	-1.69572	2.35e-06
AT5G40420.1	4.56481	1.11e-06
AT5G41080.1	-1.45756	1.06e-05
AT5G42380.1	-1.48117	2.91e-12
AT5G43450.1	1.74169	5.26e-06
AT5G45950.1	7.41204	1.19e-05
AT5G49080.1	1.32169	4.67e-38
AT5G51190.1	-1.06401	9.54e-37
AT5G52050.1	-1.30668	9.36e-08
AT5G54490.1	-1.24079	5.41e-07
AT5G56080.1	-1.19261	4.19e-22
AT5G57010.1	-1.01534	2.64e-11
AT5G57560.1	-1.0997	1.94e-37
AT5G59680.1	-1.43557	2.99e-23
AT5G66570.1	1.28003	3.54e-18
AT5G66780.1	4.74169	1.48e-07
AT5G67060.1	4.94814	9.97e-09

## Sheet: arf7-MOCK VS Col-MOCK
	arf7-MOCK VS Col-MOCK
GeneID	log2 Ratio	P-value
AT1G01580.1	2.09391	1.8e-62
AT1G02920.1	-1.66388	1.04e-121
AT1G02930.1	-2.14656	4.28e-07
AT1G05310.1	1.33436	1.23e-08
AT1G06000.1	1.1331	4.26e-16
AT1G06460.1	-1.20206	2.92e-09
AT1G07350.2	1.20729	7.08e-06
AT1G07400.1	1.8805	3.29e-55
AT1G10370.1	1.51754	1.83e-17
AT1G10960.1	1.0368	3.88e-21
AT1G11530.1	-1.16763	3.51e-11
AT1G12780.1	-1.07482	7.36e-52
AT1G13130.1	1.61897	1.39e-08
AT1G13520.1	-1.06725	1.21e-10
AT1G14960.1	1.16931	9.99e-14
AT1G15820.1	-1.20276	5.2e-06
AT1G16400.1	1.26806	7.71e-12
AT1G17840.1	-1.76364	9.15e-10
AT1G19530.1	-1.57614	1.3e-63
AT1G21120.1	-2.19796	2.55e-75
AT1G21130.1	-4.02103	2.17e-08
AT1G21400.1	-1.81442	4.21e-15
AT1G21910.1	1.11678	6.24e-19
AT1G22770.1	-1.50499	5.78e-89
AT1G23160.1	1.67129	1.27e-07
AT1G24420.1	-1.06822	1.74e-05
AT1G26380.1	-3.07107	1.05e-08
AT1G26410.1	-6.81059	4.39e-05
AT1G26420.1	-2.4147	7.3e-19
AT1G27950.1	-1.03854	9.07e-15
AT1G28010.1	-1.90757	1.13e-06
AT1G29670.1	-1.38729	3.25e-05
AT1G29930.1	-1.90206	5.91e-32
AT1G30530.1	1.49777	6.98e-08
AT1G31330.1	-1.51853	3.29e-16
AT1G31850.1	1.65139	4.18e-05
AT1G32450.1	-1.15833	7.61e-299
AT1G33055.1	-1.14002	1.39e-09
AT1G33790.2	-1.38527	4.29e-07
AT1G43790.1	1.08011	1.01e-10
AT1G47395.1	2.06643	7.03e-06
AT1G47590.1	1.38054	2.51e-07
AT1G50750.1	1.1039	8.03e-14
AT1G53480.2	-5.32589	1.33e-11
AT1G53540.1	1.96455	1.07e-05
AT1G54050.1	1.96787	1.45e-22
AT1G55390.1	1.00871	3.35e-05
AT1G56660.1	1.09497	4.67e-76
AT1G58370.1	1.16597	2.06e-46
AT1G59860.1	1.42583	1.25e-14
AT1G61480.1	-1.49917	1.77e-06
AT1G62770.1	-1.52393	2.25e-20
AT1G62975.1	1.17449	3.71e-11
AT1G63295.1	1.59844	5.45e-10
AT1G64480.1	-2.41162	2.28e-06
AT1G64500.1	1.8924	2.84e-05
AT1G66950.1	-3.33956	5.83e-11
AT1G68050.1	-1.62973	1.21e-27
AT1G70500.1	1.40835	1.18e-08
AT1G70880.1	-1.12839	6.7e-10
AT1G71030.1	-3.11944	6.08e-17
AT1G73010.1	1.247	4.27e-05
AT1G73120.1	2.18672	1.19e-13
AT1G73540.1	1.04455	9.02e-26
AT1G73885.1	-1.02979	1.42e-08
AT1G74310.1	1.25988	7.18e-213
AT1G74930.1	1.34327	3.03e-05
AT1G76410.1	-1.37568	5.67e-34
AT1G77760.1	1.16115	1.01e-30
AT1G78950.1	-1.11414	7.93e-06
AT1G80340.1	1.06643	1.73e-05
AT2G02850.1	-1.38674	1.78e-08
AT2G14510.1	-1.10349	2.19e-08
AT2G15830.1	-1.78918	6.24e-15
AT2G19970.1	-2.00396	4.44e-10
AT2G22590.1	2.5541	2.06e-20
AT2G23170.1	2.95686	5.77e-121
AT2G23910.1	2.3455	1.45e-80
AT2G25530.1	1.00151	1.1e-10
AT2G26480.1	-1.23313	2.65e-06
AT2G26560.1	-2.09111	1.09e-07
AT2G28630.1	-2.07107	1.72e-08
AT2G29320.1	-1.29432	1.19e-07
AT2G29450.1	1.083	1.77e-43
AT2G29500.1	1.22603	5e-33
AT2G30020.1	1.01457	2.57e-28
AT2G30570.1	-1.79864	6.76e-06
AT2G31945.1	-1.12375	1.48e-12
AT2G33830.2	-1.60269	2.07e-69
AT2G34420.1	-2.72207	7.16e-58
AT2G34810.1	1.15479	2.74e-11
AT2G38390.1	-1.49254	1.87e-46
AT2G38530.1	-1.95795	3.14e-37
AT2G39370.1	-1.40564	8.95e-07
AT2G39400.1	-1.59839	2.81e-11
AT2G40340.1	-1.34861	4.43e-06
AT2G41640.2	1.11827	2.67e-05
AT2G42840.1	-2.04351	7.45e-102
AT2G43570.1	-1.01603	8.19e-07
AT2G47460.1	1.21327	2.88e-24
AT3G01970.1	-1.36241	1.11e-07
AT3G02550.1	-1.32059	3.53e-09
AT3G02840.1	1.581	4.31e-06
AT3G05140.1	-2.04905	7.13e-07
AT3G07720.1	1.07156	9.89e-38
AT3G09390.1	-1.97566	1.33e-64
AT3G10520.1	1.10038	3.04e-05
AT3G12580.1	1.20115	0
AT3G13870.1	1.20029	1.84e-05
AT3G15450.2	-1.12949	5.05e-07
AT3G15500.1	-1.21041	1.1e-07
AT3G16370.1	-1.95276	4.28e-24
AT3G16400.1	1.01396	5.78e-10
AT3G16530.1	-1.57743	1.38e-12
AT3G19710.1	1.33126	3.01e-11
AT3G19970.1	1.02863	5.94e-06
AT3G20160.1	1.31436	4.49e-07
AT3G20470.1	-2.4093	4.84e-36
AT3G21090.1	-1.62872	1.17e-06
AT3G21560.1	1.46986	5.34e-45
AT3G21680.1	1.02249	3e-05
AT3G22840.1	1.3009	1.78e-08
AT3G23150.1	-1.16716	1.14e-19
AT3G23450.1	-2.59178	1.17e-15
AT3G26220.1	-1.21561	9.33e-07
AT3G26740.1	-1.70112	2.85e-13
AT3G42658.1	-3.54828	1.09e-10
AT3G46230.1	1.42762	1.56e-11
AT3G47470.1	-2.2429	4.39e-42
AT3G47500.1	-1.42295	9.34e-11
AT3G47600.1	-2.11799	6.94e-07
AT3G54150.1	-1.29026	3.57e-07
AT3G55120.1	1.92371	3.68e-107
AT3G56970.1	1.70115	1.57e-06
AT3G58190.1	-2.84046	6.43e-06
AT3G59340.1	1.18191	1.17e-08
AT3G59480.1	-1.56106	4.43e-19
AT3G60140.1	-1.18318	1.57e-06
AT3G61470.1	-1.65939	2.87e-08
AT3G63380.1	-1.38884	1.37e-38
AT4G01010.1	-1.31208	2.87e-07
AT4G01525.1	2.12301	1.12e-13
AT4G02770.1	-1.44258	3.43e-06
AT4G04750.1	1.93519	3.49e-10
AT4G04840.1	1.73781	6.05e-17
AT4G04890.1	-3.32589	2.88e-24
AT4G08780.1	-1.56293	1.15e-08
AT4G10310.1	1.18507	3.76e-09
AT4G10340.1	-1.95742	1.19e-13
AT4G10500.1	1.62365	7.43e-10
AT4G11210.1	1.32877	1.4e-26
AT4G11650.1	-1.3791	7.51e-92
AT4G12470.1	-1.44716	2.33e-69
AT4G12550.1	-1.32015	2.27e-72
AT4G13310.1	-1.05556	8.11e-06
AT4G13395.1	1.07749	4.05e-07
AT4G13830.2	-1.02821	3.23e-06
AT4G14690.1	1.65139	3.57e-07
AT4G15150.1	1.16597	7.47e-09
AT4G15290.1	1.0858	4.83e-08
AT4G15480.1	2.51199	2.69e-31
AT4G18197.1	-1.51423	7.25e-25
AT4G18205.1	-1.26007	8.24e-10
AT4G19690.2	2.57052	5.56e-91
AT4G23700.1	-1.02146	1.79e-17
AT4G24430.1	1.1789	2.14e-05
AT4G25200.1	3.26806	4.79e-10
AT4G27260.1	-1.73126	3.6e-64
AT4G28110.1	1.06091	1.54e-12
AT4G29050.1	-1.84046	1.8e-05
AT4G29200.1	-9.35353	1.26e-197
AT4G30140.1	-2.48438	2.92e-46
AT4G31875.1	-1.59137	7.22e-26
AT4G31940.1	2.81366	8.62e-17
AT4G33220.1	-1.04678	1.49e-05
AT4G33810.1	1.85784	8.69e-06
AT4G34250.1	-2.77792	2.12e-13
AT4G34410.1	1.5869	2.65e-15
AT4G35770.2	-1.82339	4.19e-07
AT4G36260.1	-2.74092	1.94e-05
AT4G37390.1	-1.54666	3.21e-57
AT4G38770.1	-1.51165	4.84e-16
AT5G01530.1	-1.27288	2e-19
AT5G01870.1	-2.2881	1.04e-66
AT5G02160.1	-1.96919	1.89e-05
AT5G02810.1	-2.66553	1.15e-98
AT5G04120.1	1.49792	8.25e-23
AT5G04150.1	1.24093	1.1e-05
AT5G05270.1	2.19571	5.33e-10
AT5G07440.3	-1.31208	1.61e-06
AT5G07990.1	2.71552	3.11e-77
AT5G08640.1	1.60896	1.12e-17
AT5G12020.1	4.11082	2e-16
AT5G12030.1	2.22171	1.2e-13
AT5G12110.1	1.19453	3.56e-17
AT5G13930.1	1.28064	0
AT5G16810.1	-1.2165	5.22e-05
AT5G17040.1	2.49939	4.06e-09
AT5G17050.1	1.08803	2.95e-22
AT5G22500.1	-1.9122	6.98e-08
AT5G23660.1	-1.06781	1.34e-26
AT5G24160.1	-2.96332	2.78e-09
AT5G25250.1	-1.12745	7.41e-09
AT5G35935.1	2.00134	8.12e-37
AT5G37550.1	1.7727	4e-07
AT5G38010.1	1.02796	7.27e-06
AT5G38700.1	1.58999	7.3e-07
AT5G39610.1	-1.0397	1.88e-12
AT5G41380.1	1.65139	2.29e-05
AT5G41750.1	-1.51853	2.4e-05
AT5G43450.1	-1.99966	2.8e-08
AT5G45670.1	-1.89935	1.83e-13
AT5G46050.1	-1.16098	7.54e-06
AT5G47560.1	-1.12425	1.88e-38
AT5G48010.2	1.15879	4.33e-14
AT5G48430.1	-1.39752	2.98e-26
AT5G48570.1	1.59287	3.19e-233
AT5G51440.1	1.14107	2.82e-80
AT5G51750.1	-1.80804	2.5e-10
AT5G52020.1	1.14872	6.47e-25
AT5G52640.1	1.28925	0
AT5G54270.1	-2.1815	6.44e-08
AT5G56080.1	1.36625	4.77e-28
AT5G56100.1	-1.72921	5.07e-17
AT5G57220.1	-3.07548	1.15e-78
AT5G58650.1	-1.05619	8.34e-07
AT5G62210.1	1.99517	1.05e-35
AT5G64120.1	-1.08676	1.02e-102
AT5G65600.1	-2.88777	3.69e-06
ATMG01360.1	-1.08381	3.72e-05

## Sheet: Col-NAA VS Col-MOCK
	Col-NAA VS Col-MOCK
GeneID	log2 Ratio	P-value
AT1G07350.2	1.33	3.78e-07
AT1G08430.1	1.55	6.7e-13
AT1G09540.1	1.31	1.25e-11
AT1G18300.1	1.23	1.13e-48
AT1G19210.1	2.75	9.35e-12
AT1G28010.1	1.17	2.54e-07
AT1G28370.1	1.3	3.23e-07
AT1G28670.1	1.26	1.6e-13
AT1G29660.1	1.68	9.37e-11
AT1G44970.1	1.07	4.07e-23
AT1G50750.1	1.95	2.11e-53
AT1G53830.1	1.05	2.78e-38
AT1G54970.1	1.27	2.48e-18
AT1G61840.1	1	2.94e-05
AT1G62770.1	1.3	1.34e-38
AT1G64405.1	2.07	6.46e-06
AT1G64670.1	1.59	3.49e-10
AT1G73540.1	1.67	1.05e-78
AT1G74450.1	1.1	2.7e-16
AT1G74930.1	2.19	2.13e-15
AT1G77760.1	2.11	1.34e-136
AT2G01180.2	1.61	6.45e-06
AT2G19970.1	1.4	1.71e-15
AT2G19990.1	1.63	1.41e-07
AT2G20750.1	1.3	2.8e-39
AT2G21140.1	1.42	2.07e-06
AT2G22760.1	2.97	3.95e-05
AT2G24980.1	1.13	2.47e-51
AT2G25150.1	1.73	4.09e-07
AT2G30020.1	1.6	1.02e-83
AT2G34490.1	1.07	5.65e-13
AT2G36050.1	1.45	1.28e-07
AT2G39040.1	1.11	2.96e-16
AT2G40610.1	1.57	5.06e-24
AT2G42840.1	1.09	5.78e-88
AT2G43590.1	1.65	6.57e-129
AT3G02840.1	2.05	8.08e-11
AT3G03280.1	1.21	3.73e-08
AT3G10870.1	2.45	3.42e-16
AT3G16370.1	1.27	2.24e-31
AT3G25790.1	1.17	1.99e-14
AT3G26550.1	1.19	4.51e-07
AT3G27095.1	6.52	2.58e-05
AT3G29780.1	1	5.2e-05
AT3G44260.1	1.58	1.48e-99
AT3G46800.1	2.51	7.57e-07
AT3G49960.1	1.02	4.08e-17
AT3G51600.1	1.07	3.34e-15
AT3G56220.1	1.59	1.75e-05
AT3G58190.1	1.41	1.75e-06
AT4G08410.1	1.15	2.07e-38
AT4G11280.1	1.01	5.3e-46
AT4G11880.1	2.13	2.32e-08
AT4G12545.1	1.06	2.58e-50
AT4G12550.1	2.59	0
AT4G13190.1	2.75	1.51e-08
AT4G13390.1	1.01	8.23e-48
AT4G13395.1	1.58	3.88e-16
AT4G24570.1	1.51	1.33e-134
AT4G25250.1	1.32	3.63e-23
AT4G27280.1	1.25	8.95e-88
AT4G27654.1	2.18	1.51e-12
AT4G27657.1	1.04	1.67e-08
AT4G28850.1	3.3	1.06e-06
AT4G29780.1	1.45	3.7e-113
AT4G30140.1	2.27	4.92e-198
AT4G33220.1	1.04	3.63e-10
AT4G34250.1	1.01	1.85e-07
AT4G34410.1	1.93	8.28e-25
AT5G06630.1	1.03	1.24e-24
AT5G17350.1	1.53	2.13e-34
AT5G22250.1	1.02	4.67e-17
AT5G24100.1	1.05	1.87e-18
AT5G24140.1	1.12	6.49e-08
AT5G24313.1	1.25	3.56e-05
AT5G35190.1	1.14	9.52e-73
AT5G38940.1	1.07	7.34e-08
AT5G42510.1	1.02	2.72e-06
AT5G49080.1	1.31	3.37e-41
AT5G51190.1	1.07	1.64e-64
AT5G55050.1	1.66	7.8e-47
AT5G55780.1	1.84	4.82e-06
AT5G58580.1	1.71	1.7e-05
AT5G61430.1	1.23	1.14e-06
AT5G65320.1	2.09	6.41e-10
AT5G65390.1	1.14	5.73e-106
AT5G65800.1	1.49	1.17e-07
AT5G67430.1	1.45	1.15e-29

## Sheet: arf7-NAA VS Col-NAA
	arf7-NAA VS Col-NAA
GeneID	log2 Ratio	P-value
AT1G01580.1	1.04985	7.67e-08
AT1G02220.1	1.5518	1.35e-22
AT1G02230.1	1.58483	1.21e-05
AT1G02920.1	-1.01073	4.79e-25
AT1G03010.1	-1.31208	1.25e-05
AT1G03106.1	3.83276	4.24e-07
AT1G03820.1	1.62536	8.04e-11
AT1G04100.1	-1.61019	9.18e-06
AT1G04560.1	9.67176	4.52e-16
AT1G05135.1	-2.24406	7.14e-08
AT1G06360.1	7.43426	4.05e-05
AT1G07135.1	-1.1871	9.05e-16
AT1G07350.2	-1.18517	5.6e-06
AT1G07985.1	1.02383	1.11e-06
AT1G08115.1	-2.3484	1.06e-06
AT1G08430.1	-1.55535	1.88e-12
AT1G09310.1	2.13061	1.31e-24
AT1G09340.1	1.0348	1.98e-05
AT1G10370.1	1.52438	7.2e-12
AT1G10960.1	1.22352	1.06e-33
AT1G17840.1	-1.10146	5.5e-08
AT1G18300.1	-1.63719	1.22e-70
AT1G19210.1	-2.26609	2.71e-09
AT1G20340.1	1.54642	1.14e-19
AT1G21120.1	1.06244	2.38e-05
AT1G22770.1	-2.1082	4.61e-192
AT1G24140.1	-1.7966	3.19e-05
AT1G26250.1	1.32849	5.65e-38
AT1G27730.1	-1.5757	2.62e-193
AT1G27950.1	-1.13308	1.14e-25
AT1G28010.1	-3.51907	2.45e-24
AT1G28370.1	-1.93649	2.42e-11
AT1G28670.1	-1.16433	1.06e-11
AT1G29660.1	-3.53357	2.58e-22
AT1G29910.1	2.30026	7.89e-07
AT1G29930.1	1.2329	4.08e-30
AT1G30370.1	-1.25471	2.93e-19
AT1G32060.1	1.82203	7.2e-08
AT1G32450.1	-1.67036	0
AT1G32560.1	5.16533	4.24e-10
AT1G32920.1	-1.16664	2.63e-50
AT1G42970.1	1.69084	1.73e-10
AT1G43800.1	1.10762	3.74e-08
AT1G48130.1	7.65874	4.05e-05
AT1G49200.1	1.09313	1.24e-05
AT1G50750.1	-2.31158	4.81e-63
AT1G53480.2	-5.24406	5.68e-11
AT1G54870.1	4.20715	2.12e-09
AT1G55670.1	1.24779	7.05e-07
AT1G56430.1	1.74393	1.11e-29
AT1G60010.1	-1.89917	3.63e-37
AT1G61480.1	-1.67886	2.48e-09
AT1G61800.1	4.24779	2.44e-05
AT1G62770.1	-2.25752	3.03e-78
AT1G64405.1	-1.95776	2.14e-05
AT1G64480.1	-3.13159	1.4e-07
AT1G64670.1	-2.08563	1.52e-13
AT1G66400.1	-1.21911	1.12e-05
AT1G66500.1	-1.18857	9.95e-14
AT1G66950.1	-2.8799	2.87e-17
AT1G66960.1	-3.38156	3.41e-05
AT1G67090.1	2.66283	1.5e-12
AT1G67740.1	1.58234	4.22e-11
AT1G68050.1	-1.18517	4.18e-14
AT1G68250.1	8.43576	5.37e-07
AT1G69870.1	2.22987	2.29e-06
AT1G70890.1	-1.00807	1.53e-27
AT1G71030.1	-2.66629	4.56e-11
AT1G72490.1	1.00861	3.46e-06
AT1G73540.1	-1.77199	5.96e-82
AT1G74080.1	-2.08133	1.32e-08
AT1G74470.1	1.12602	7.01e-23
AT1G74930.1	-2.61019	7.96e-18
AT1G77520.1	1.24477	5.61e-08
AT1G78820.1	2.27051	2.04e-05
AT1G80340.1	1.16128	8.96e-06
AT1G80840.1	-1.51969	1.44e-33
AT2G01180.2	-1.94767	5.34e-07
AT2G14247.1	2.00387	1.7e-05
AT2G15830.1	-1.35385	3e-08
AT2G16890.2	2.74083	2.17e-07
AT2G18150.1	-1.37918	1.37e-10
AT2G18540.1	6.99219	1.1e-06
AT2G19900.1	1.3468	1.35e-10
AT2G19970.1	-2.8257	7.7e-35
AT2G19990.1	-2.71063	1.39e-12
AT2G20880.1	1.3998	1.17e-05
AT2G21140.1	-1.5262	9.85e-07
AT2G21490.1	8.5489	1.27e-07
AT2G22590.1	5.34465	6.69e-22
AT2G22880.1	-2.39857	7.24e-18
AT2G23170.1	3.32357	0
AT2G23910.1	2.14543	4.74e-38
AT2G25150.1	-1.9445	8.57e-08
AT2G26530.1	-1.76167	2.98e-07
AT2G26560.1	1.60143	4.84e-05
AT2G27550.1	1.13713	3.72e-32
AT2G28490.1	7.16909	2.27e-06
AT2G28630.1	-2.74656	4.25e-14
AT2G30020.1	-1.50025	3.76e-73
AT2G31480.1	-2.98103	2.82e-05
AT2G33580.1	-1.06701	1.66e-20
AT2G33850.1	-2.7481	4.75e-13
AT2G34420.1	-1.3945	2.03e-20
AT2G35300.1	3.75029	2.94e-12
AT2G36050.1	-1.14452	1.72e-05
AT2G36220.1	-1.27112	1.9e-105
AT2G36640.1	8.91509	1.23e-17
AT2G36800.1	3.3998	3.54e-07
AT2G37430.1	-1.05765	3.37e-07
AT2G37970.1	1.18951	2.85e-30
AT2G38390.1	-1.29435	5.18e-39
AT2G38540.1	2.4471	4.11e-10
AT2G39370.1	-1.8826	4.57e-15
AT2G39400.1	-1.41963	1.78e-07
AT2G39650.1	-1.11147	1.58e-09
AT2G40170.1	5.03206	3.38e-09
AT2G41640.2	1.3542	2.9e-08
AT2G42560.1	8.92015	6.81e-24
AT2G42840.1	-2.33139	7.15e-247
AT2G43590.1	-1.06686	3.89e-64
AT2G44080.1	-1.00067	1.82e-12
AT2G44840.1	-2.3484	1.06e-06
AT2G47460.1	1.3355	2.49e-24
AT2G47770.1	8.81332	4.59e-11
AT2G47780.1	8.88194	3.99e-10
AT3G01570.1	3.11349	8.84e-09
AT3G01970.1	-1.11307	1.21e-06
AT3G02480.1	4.64265	9.4e-37
AT3G02550.1	-1.00679	1.54e-08
AT3G02840.1	-2.1616	5.03e-11
AT3G03280.1	-1.63363	1.28e-11
AT3G03341.1	9.3008	6.18e-08
AT3G10020.1	-1.00702	1.72e-19
AT3G10870.1	-5.6636	1.58e-28
AT3G10930.1	-1.50709	3.47e-22
AT3G12830.1	-1.35603	1.56e-10
AT3G13950.1	-2.6002	9.02e-06
AT3G14770.1	1.35143	3.21e-15
AT3G15353.1	-1.60225	4.22e-12
AT3G15670.1	6.41772	7.15e-48
AT3G16370.1	-2.23602	1.38e-64
AT3G16720.1	-1.00145	5.5e-28
AT3G17520.1	5.18639	7.65e-38
AT3G18710.1	-1.21875	4.65e-07
AT3G19920.1	7.4177	4.66e-06
AT3G20470.1	-3.15679	9.09e-76
AT3G20760.1	-3.43309	6.82e-12
AT3G21055.1	2.03723	2.95e-09
AT3G21090.1	-1.25144	1.68e-06
AT3G21560.1	1.41356	1.58e-50
AT3G21720.1	2.39283	0
AT3G22060.1	-1.84179	2.73e-22
AT3G22640.1	9.14599	2.17e-21
AT3G22830.1	1.62676	5.69e-21
AT3G22840.1	1.81039	3.96e-22
AT3G23150.1	-1.22914	2.16e-23
AT3G23170.1	-1.18629	8.68e-14
AT3G23450.1	-2.76716	1.18e-30
AT3G26650.1	1.5279	5.82e-13
AT3G28340.1	-1.12591	3.32e-25
AT3G28580.1	-1.38822	2.03e-11
AT3G29000.1	-1.20342	4.97e-10
AT3G42658.1	-5.53684	1.7e-13
AT3G44260.1	-1.96455	2.35e-128
AT3G46650.1	-1.32068	2.58e-06
AT3G46800.1	-2.20753	7.8e-06
AT3G47500.1	-1.45139	9.76e-10
AT3G47600.1	-1.71355	6.86e-09
AT3G50060.1	-1.13159	1.13e-09
AT3G50930.1	-1.02057	1.52e-22
AT3G51350.1	-1.26489	2.94e-16
AT3G51810.1	9.15458	5.29e-12
AT3G53040.1	3.04134	2.99e-08
AT3G54940.2	9.20972	2.92e-18
AT3G55120.1	2.64302	5.49e-101
AT3G55800.1	2.59244	2.43e-07
AT3G55980.1	-1.16396	1.26e-111
AT3G58190.1	-3.40018	1.03e-15
AT3G59480.1	-1.36554	8.14e-19
AT3G59900.1	-1.5811	8.43e-06
AT3G60550.1	-1.28121	8.47e-08
AT3G61470.1	1.1189	2.25e-06
AT3G62740.1	1.95234	5.19e-06
AT4G01430.1	-1.52879	4.29e-06
AT4G04840.1	2.46614	4.65e-14
AT4G04890.1	-1.73286	1.6e-19
AT4G08780.1	-1.28253	1.54e-06
AT4G10310.1	1.9977	9.33e-17
AT4G11280.1	-1.31398	8.17e-66
AT4G11880.1	-2.50709	1.81e-09
AT4G12470.1	-1.20541	3.4e-49
AT4G12545.1	-1.42729	4.8e-76
AT4G12550.1	-4.39583	0
AT4G13190.1	-2.86073	1.73e-08
AT4G13195.1	-1.2941	3.24e-06
AT4G13290.1	1.33968	5.81e-16
AT4G13395.1	-2.24406	5.83e-24
AT4G13890.1	1.33774	5.22e-07
AT4G14270.1	-1.28891	9.57e-07
AT4G14370.1	1.00214	6.47e-08
AT4G14690.1	2.70236	6.67e-19
AT4G15480.1	2.9023	2.72e-30
AT4G15630.1	-2.29559	2.65e-08
AT4G16220.1	-3.54662	2.67e-08
AT4G17030.1	-1.29653	3.3e-05
AT4G17490.1	-1.15596	5.3e-44
AT4G18010.1	1.52718	1e-06
AT4G19690.2	1.39506	1.97e-11
AT4G21020.1	9.02966	6.09e-13
AT4G23493.1	-1.16789	3.05e-05
AT4G24570.1	-1.69896	7.93e-152
AT4G25860.1	-3.06509	3.5e-10
AT4G27030.1	1.02443	1.18e-05
AT4G27260.1	-2.36678	8.68e-148
AT4G27280.1	-1.92935	5.79e-157
AT4G27440.1	7.10195	1.97e-05
AT4G27560.1	1.25372	3.2e-08
AT4G27652.1	-1.05609	1.29e-17
AT4G27654.1	-1.65394	9.16e-09
AT4G28250.1	1.3381	9.18e-08
AT4G28750.1	1.96769	3.83e-08
AT4G28850.1	-2.45818	4.38e-05
AT4G29190.1	-1.1027	9.89e-06
AT4G29200.1	-12.8085	2.57e-212
AT4G29780.1	-1.77749	1.41e-144
AT4G30140.1	-4.54327	0
AT4G30370.1	-1.27207	2.22e-08
AT4G33220.1	-1.78096	3.21e-20
AT4G33666.1	1.23459	7.89e-09
AT4G34250.1	-2.56368	4.69e-23
AT4G34410.1	-2.14031	6.45e-27
AT4G36220.1	-1.0017	6.36e-09
AT4G36250.1	-1.4466	3.01e-27
AT4G36260.1	-2.13513	5.01e-07
AT4G36600.1	5.43542	3.25e-12
AT4G37390.1	-1.13015	1.8e-48
AT4G38420.1	1.90384	2.52e-05
AT5G01870.1	-3.38787	3.65e-169
AT5G02810.1	-2.89361	7.49e-104
AT5G03545.1	-1.05424	1.71e-20
AT5G03670.1	-1.17149	2.46e-07
AT5G04330.1	-1.06572	3.36e-05
AT5G04340.1	-1.05241	1.49e-51
AT5G05270.1	2.47997	1.32e-06
AT5G06730.1	-1.3627	4.79e-07
AT5G06760.1	3.1034	1.05e-11
AT5G07330.1	3.3258	1.18e-08
AT5G07990.1	2.113	1.35e-35
AT5G08050.1	2.13676	2.35e-10
AT5G08640.1	2.50671	1.07e-21
AT5G09440.1	-1.31033	1.4e-69
AT5G12030.1	1.60511	2.64e-05
AT5G13930.1	2.05851	0
AT5G15780.1	1.96239	1.75e-06
AT5G17040.1	2.24779	4.56e-07
AT5G17050.1	1.14406	6.61e-23
AT5G17350.1	-1.62823	6.19e-36
AT5G20150.1	1.10402	4.88e-09
AT5G20630.1	4.00387	1.67e-18
AT5G22020.1	1.22719	9.52e-75
AT5G22250.1	-1.57421	1.42e-30
AT5G22470.1	6.14168	4.05e-05
AT5G23010.1	-1.63834	1.32e-17
AT5G24880.1	-1.34663	2.32e-07
AT5G27420.1	-1.16241	1.56e-26
AT5G35935.1	1.68716	2.31e-27
AT5G38420.1	3.16533	8.88e-11
AT5G38430.1	3.74083	2.09e-09
AT5G38940.1	-1.0826	1.02e-07
AT5G39670.1	-1.49906	9.84e-14
AT5G40420.1	8.55221	6.18e-08
AT5G40590.1	-1.17006	7.78e-06
AT5G42380.1	-1.51581	5.01e-13
AT5G43620.1	-1.02167	1.72e-06
AT5G44417.1	-1.12325	4.47e-26
AT5G45670.1	-1.0012	7.02e-07
AT5G47230.1	-1.11976	1.58e-37
AT5G47550.1	-2.02905	3.34e-07
AT5G49340.1	1.3998	1.13e-12
AT5G50100.1	1.06307	1.57e-05
AT5G51190.1	-1.80762	1.12e-133
AT5G51750.1	-1.36508	7.94e-12
AT5G54490.1	-1.77558	2.45e-15
AT5G54510.1	-1.53114	1.42e-52
AT5G55050.1	-1.12535	1.4e-25
AT5G57660.1	-1.35558	6.64e-54
AT5G58580.1	-2.33717	2.61e-07
AT5G59220.1	1.71014	2.04e-12
AT5G59320.1	2.00387	1.23e-07
AT5G59550.1	-1.08011	2.01e-43
AT5G62210.1	2.55247	1.05e-36
AT5G64120.1	-1.53269	0
AT5G64180.1	-1.06652	6.11e-10
AT5G64660.1	-1.39028	6.57e-32
AT5G65320.1	-2.3436	9.28e-11
AT5G66700.1	-2.24406	1.95e-05
AT5G66780.1	2.77831	1.79e-05
AT5G67430.1	-1.80478	2.99e-38
